# Supplementary material for: Attributes of Provider Referrals for Digital Mental Health Applications in an Integrated Health System, 2019–2021
Source: Atypon-hosted journal article supplement (doi:10.1176/appi.ps.20220401), 2023-07-26

# Online Supplement

## Supplemental Figure. Sample Selection

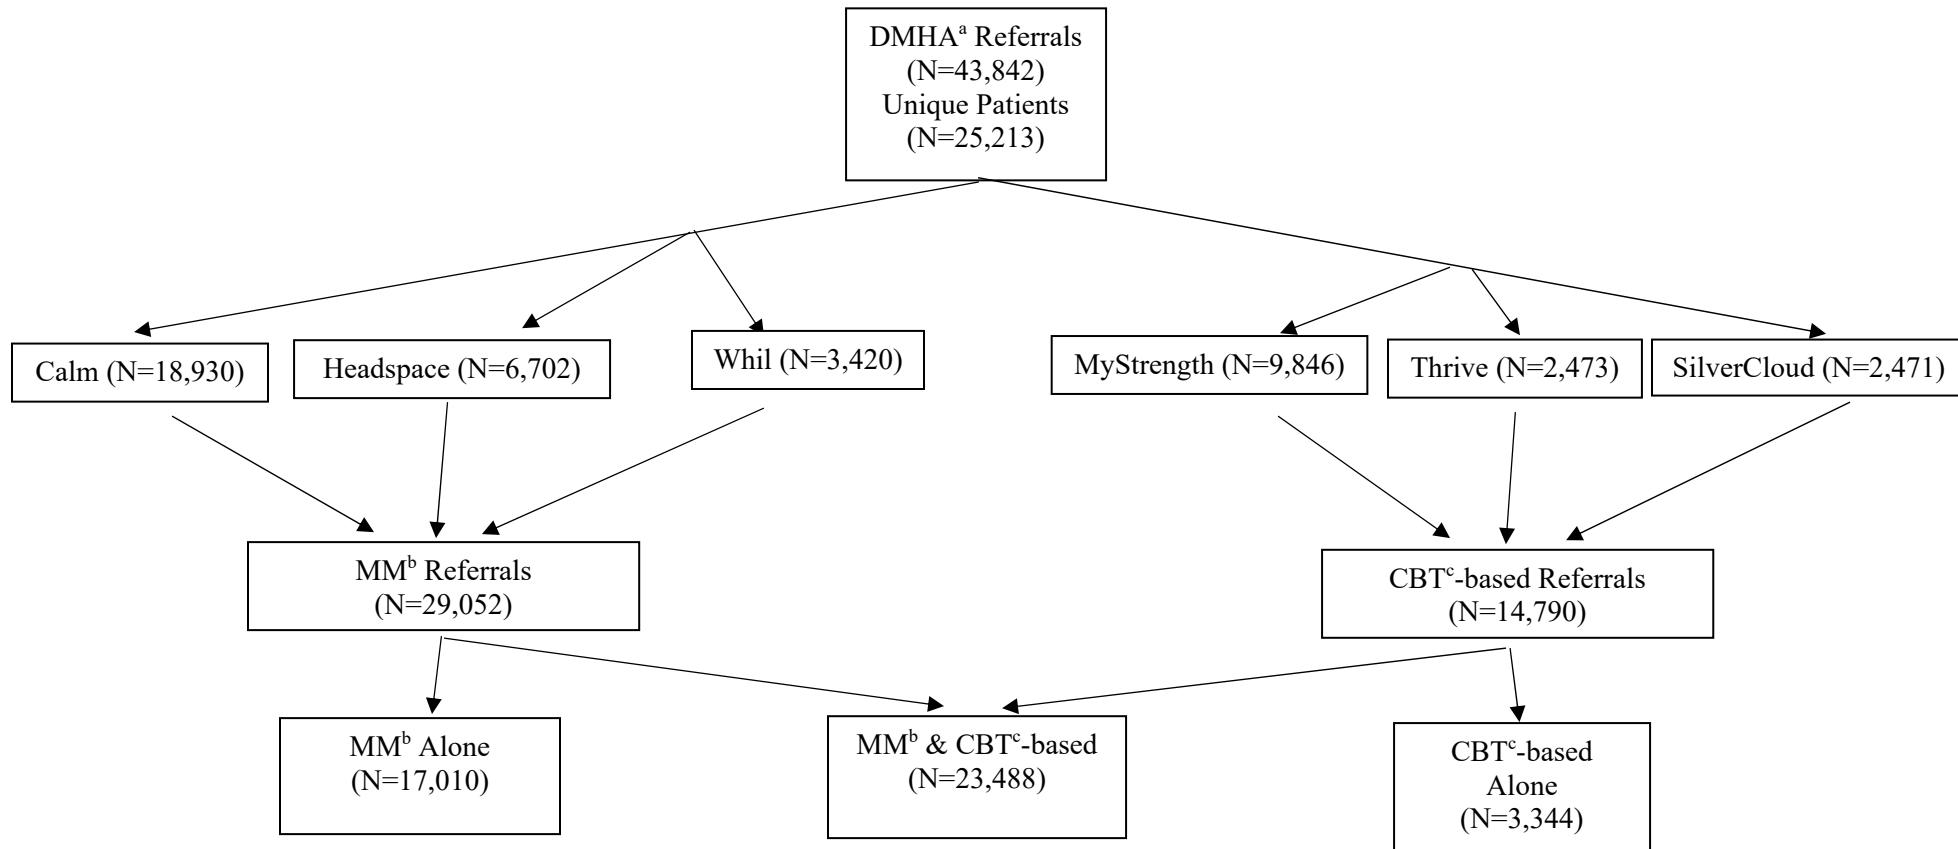

<sup>a</sup> Digital Mental Health Application (DMHA)

<sup>b</sup> Mindfulness and Meditation (MM)

<sup>c</sup> Cognitive Behavioral Therapy (CBT)

**Supplemental Table.** Attributes Associated with Different Referral Clusters

| Attribute                                          | CBT <sup>a</sup> vs. MM <sup>b</sup> |                 |                 | MM <sup>a</sup> +CBT <sup>b</sup> vs. MM <sup>a</sup> |                 |                 | MM <sup>a</sup> +CBT <sup>b</sup> vs. CBT <sup>b</sup> |                 |                 |
|----------------------------------------------------|--------------------------------------|-----------------|-----------------|-------------------------------------------------------|-----------------|-----------------|--------------------------------------------------------|-----------------|-----------------|
|                                                    | RRR <sup>c</sup>                     | Lower<br>95% CI | Upper<br>95% CI | RRR <sup>c</sup>                                      | Lower<br>95% CI | Upper<br>95% CI | RRR <sup>c</sup>                                       | Lower<br>95% CI | Upper<br>95% CI |
| <b>Age Category (Years)</b>                        |                                      |                 |                 |                                                       |                 |                 |                                                        |                 |                 |
| 18-30 years                                        | Ref                                  |                 |                 |                                                       |                 |                 |                                                        |                 |                 |
| 31-50 years                                        | 0.92                                 | 0.83            | 1.02            | <b>0.91</b>                                           | 0.85            | 0.98            | 0.98                                                   | 0.88            | 1.09            |
| 51-64 years                                        | 0.93                                 | 0.81            | 1.07            | <b>0.78</b>                                           | 0.71            | 0.86            | <b>0.84</b>                                            | 0.73            | 0.97            |
| 65+ years                                          | <b>0.82</b>                          | 0.69            | 0.99            | <b>0.60</b>                                           | 0.52            | 0.69            | <b>0.73</b>                                            | 0.60            | 0.88            |
| <b>Race/Ethnicity</b>                              |                                      |                 |                 |                                                       |                 |                 |                                                        |                 |                 |
| White                                              | Ref                                  |                 |                 |                                                       |                 |                 |                                                        |                 |                 |
| Asian                                              | <b>0.77</b>                          | 0.65            | 0.91            | <b>0.87</b>                                           | 0.78            | 0.98            | 1.14                                                   | 0.95            | 1.36            |
| Black                                              | 1.10                                 | 0.99            | 1.22            | <b>1.21</b>                                           | 1.13            | 1.30            | 1.10                                                   | 0.99            | 1.23            |
| Hispanic                                           | <b>0.60</b>                          | 0.51            | 0.71            | <b>0.80</b>                                           | 0.72            | 0.89            | <b>1.33</b>                                            | 1.11            | 1.59            |
| Other                                              | 0.72                                 | 0.49            | 1.04            | 0.93                                                  | 0.74            | 1.18            | 1.31                                                   | 0.89            | 1.91            |
| <b>Gender</b>                                      |                                      |                 |                 |                                                       |                 |                 |                                                        |                 |                 |
| Male                                               | Ref                                  |                 |                 |                                                       |                 |                 |                                                        |                 |                 |
| Female                                             | <b>0.87</b>                          | 0.79            | 0.96            | 1.07                                                  | 0.99            | 1.14            | <b>1.23</b>                                            | 1.10            | 1.36            |
| <b>PHQ<sup>d</sup> Screen on Date of Encounter</b> |                                      |                 |                 |                                                       |                 |                 |                                                        |                 |                 |
| Not Completed                                      | Ref                                  |                 |                 |                                                       |                 |                 |                                                        |                 |                 |
| Completed                                          | <b>1.62</b>                          | 1.45            | 1.80            | <b>1.17</b>                                           | 1.09            | 1.25            | <b>0.72</b>                                            | 0.64            | 0.81            |
| <b>Chief Complaint</b>                             |                                      |                 |                 |                                                       |                 |                 |                                                        |                 |                 |
| Mental Health <sup>e</sup>                         | Ref                                  |                 |                 |                                                       |                 |                 |                                                        |                 |                 |
| Learning <sup>f</sup>                              | <b>1.63</b>                          | 1.19            | 2.23            | <b>1.30</b>                                           | 1.02            | 1.64            | 0.80                                                   | 0.57            | 1.10            |
| Annual Care                                        | <b>1.41</b>                          | 1.22            | 1.63            | <b>1.46</b>                                           | 1.32            | 1.61            | 1.03                                                   | 0.89            | 1.20            |
| Other <sup>g</sup>                                 | <b>1.63</b>                          | 1.46            | 1.81            | <b>1.99</b>                                           | 1.87            | 2.13            | <b>1.23</b>                                            | 1.10            | 1.36            |

| <b>Primary Diagnosis</b>               |             |      |      |             |      |      |             |      |      |
|----------------------------------------|-------------|------|------|-------------|------|------|-------------|------|------|
| Depression Single or Recurrent Episode | Ref         |      |      |             |      |      |             |      |      |
| Unspecified Mood Disorder              | 0.83        | 0.63 | 1.10 | 0.96        | 0.79 | 1.17 | 1.15        | 0.87 | 1.53 |
| Other Anxiety Disorders                | <b>0.44</b> | 0.39 | 0.50 | <b>0.65</b> | 0.59 | 0.71 | <b>1.47</b> | 1.29 | 1.68 |
| Other                                  | <b>0.60</b> | 0.53 | 0.67 | <b>0.78</b> | 0.72 | 0.85 | <b>1.31</b> | 1.16 | 1.48 |
| <b>Provider Training</b>               |             |      |      |             |      |      |             |      |      |
| Physician                              | Ref         |      |      |             |      |      |             |      |      |
| Non-physician                          | <b>1.29</b> | 1.13 | 1.46 | 1.01        | 0.93 | 1.10 | <b>0.79</b> | 0.69 | 0.90 |
| <b>Provider Location</b>               |             |      |      |             |      |      |             |      |      |
| Baltimore                              | Ref         |      |      |             |      |      |             |      |      |
| DCSM <sup>h</sup>                      | 0.98        | 0.87 | 1.10 | <b>1.99</b> | 1.83 | 2.17 | <b>2.03</b> | 1.80 | 2.29 |
| NoVA <sup>i</sup>                      | 0.91        | 0.80 | 1.04 | <b>1.26</b> | 1.15 | 1.38 | <b>1.39</b> | 1.21 | 1.59 |
| <b>Visit Type</b>                      |             |      |      |             |      |      |             |      |      |
| Office-Based                           | Ref         |      |      |             |      |      |             |      |      |
| Telephone-Based                        | 1.07        | 0.88 | 1.30 | <b>1.77</b> | 1.56 | 2.02 | <b>1.67</b> | 1.36 | 2.04 |
| Video-Based                            | 1.00        | 0.87 | 1.14 | <b>1.72</b> | 1.56 | 1.89 | <b>1.73</b> | 1.50 | 1.99 |

<sup>a</sup> Cognitive Behavioral Therapy (CBT)

<sup>b</sup> Mindfulness and Meditation (MM)

<sup>c</sup> Relative Risk Ratio

<sup>d</sup> Patient Health Questionnaire (PHQ) (either PHQ-2 or first 2 questions of PHQ-9)

<sup>e</sup> Anxiety/depression/stress

<sup>f</sup> Wellness coaching/education/counseling

<sup>g</sup> Nonmental health/annual care/wellness

<sup>h</sup> District of Columbia/Southern Maryland (DCSM)

<sup>i</sup> Northern Virginia (NoVA)

Supplemental Figure. Common Reasons for Visit (Chief Complaint) Within “Other” Category by Referral Group

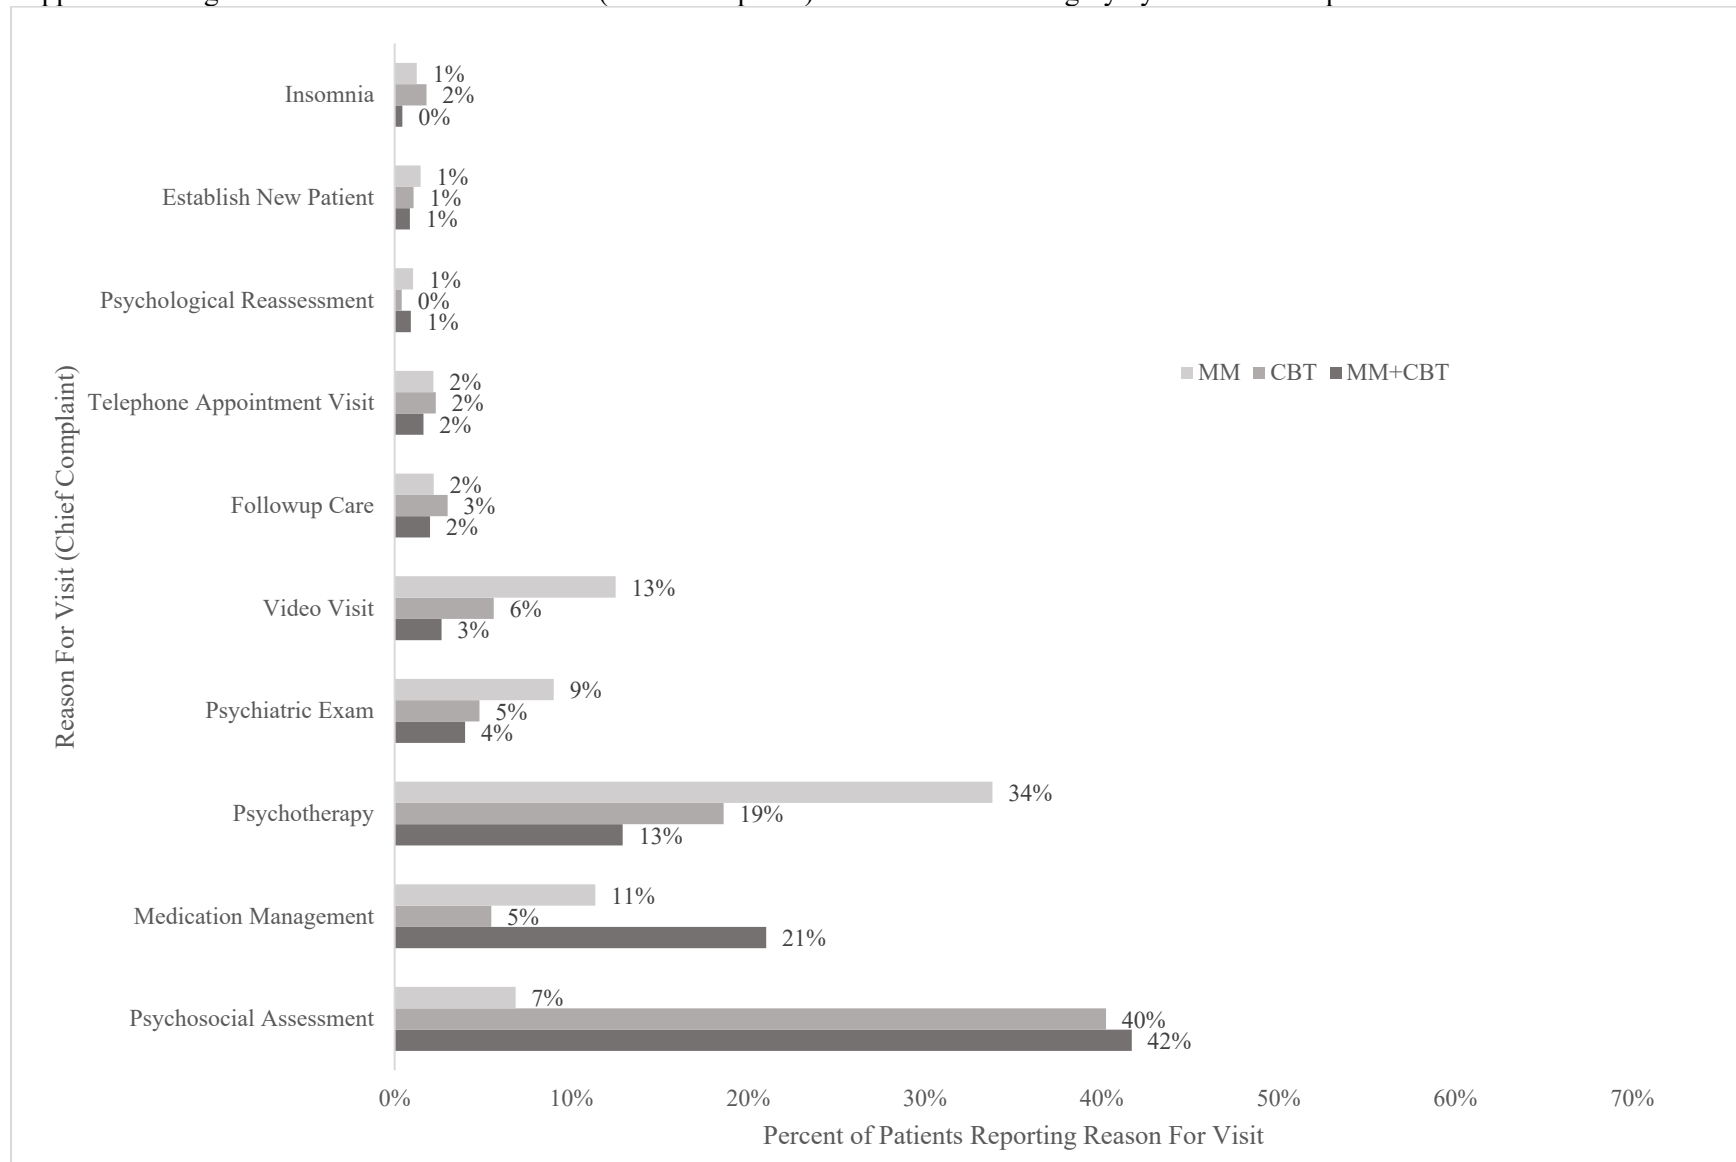

Supplemental Figure. Common Primary Diagnoses (ICD-10) Within “Other” Category by Referral Group

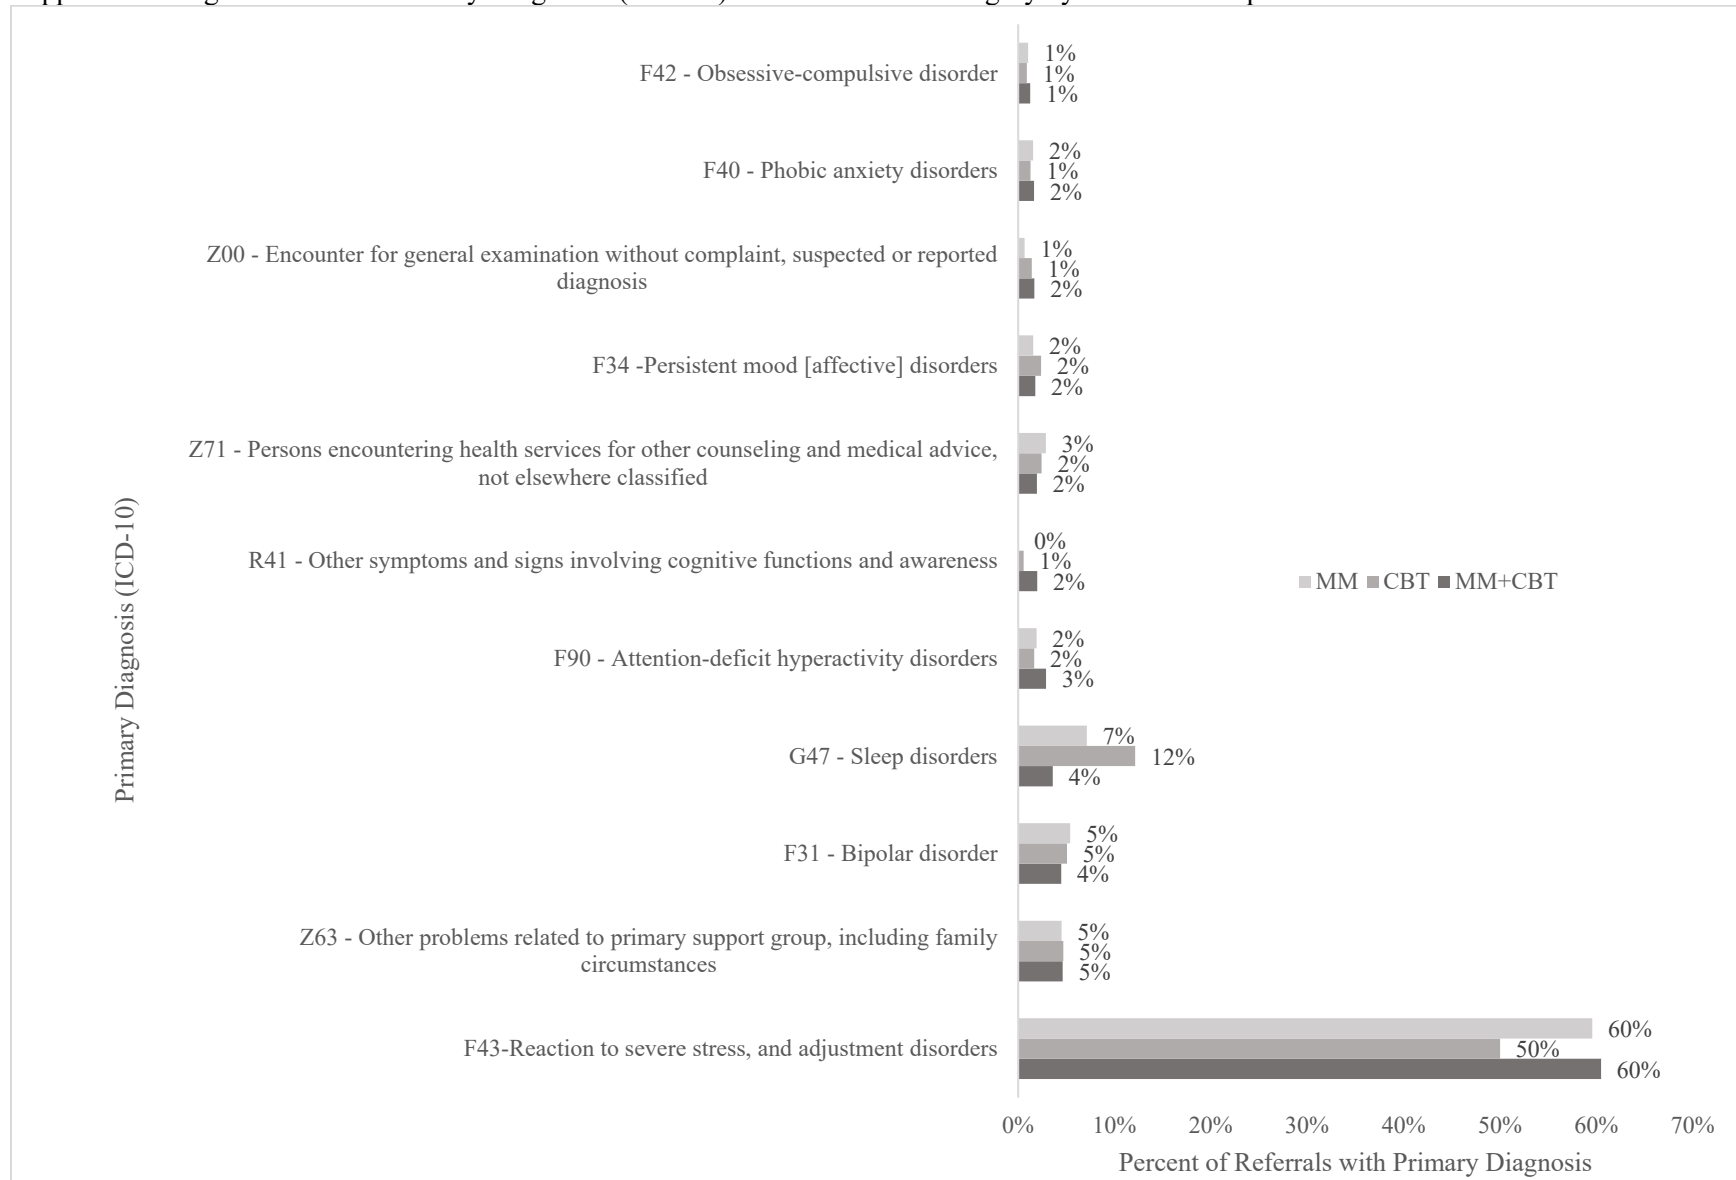

Supplement: appi.ps.20220401.ds001.pdf [file appi.ps.20220401.ds001.pdf]
